# Supplementary material for: A Predictive Tool Based on DNA Methylation Data for Personalized Weight Loss through Different Dietary Strategies: A Pilot Study
Source: MDPI journal article supplement (doi:10.3390/nu15245023), 2023-12-06

## Supplementary information

**Supplementary Table S1.** Baseline anthropometric and biochemical data of participants who can be given a prediction and participants who cannot be given a prediction of BMI percentage loss with the model.

|                            | No Prediction<br>(n=126) | Prediction (n=75) | Differences<br>between both<br>groups | P      |
|----------------------------|--------------------------|-------------------|---------------------------------------|--------|
| Gender (Men/Women)         | 44 /82                   | 17/58             | 27                                    | 0.068  |
| Age                        | 52.1±0.9                 | 54.6±1.8          | -2.4±1.4                              | 0.091  |
| BMI (kg/ m <sup>2</sup> )  | 31.6± 0.3                | 31.7± 0.4         | -0.03±0.5                             | 0.940  |
| Weight (kg)                | 88.4±1.2                 | 86.5±1.5          | -1.9±1.9                              | 0.321  |
| Waist circumference(cm)    | 102± 0.9                 | 101± 1.1          | -0.9±1.5                              | 0.550  |
| Hip circumference (cm)     | 111± 0.7                 | 111± 0.8          | -0.2±1.1                              | 0.851  |
| Lean mass dxa (g)          | 48844± 890.8             | 4700±1066.6       | 1843±1416.2                           | 0.1945 |
| Fat mass dxa (g)           | 36848±670.2              | 36606±861.6       | 242±1092.7                            | 0.824  |
| Visceral fat mass dxa (g)  | 1487± 79.7               | 1332±86.7         | 154±122.9                             | 0.210  |
| Diastolic pressure (mmHg)  | 79±1.1                   | 79±1.2            | 0.5±1.6                               | 0.727  |
| Systolic pressure (mmHg)   | 129± 1.7                 | 129±1.9           | 0.6±2.7                               | 0.816  |
| Diet (MHP/LF) n(%MHP)      | 61(31%)                  | 32(18%)           | 29(11%)                               | 0.429  |
| Total energy (Kcal)        | 1530± 19.7               | 1482±23.8         | 47.7±31.4                             | 0.130  |
| Glucose (mmol/L)           | 5.1± 0.1                 | 5.1±0.1           | -0.1±0.1                              | 0.874  |
| Insulin (mU/l)             | 7.6±0.4                  | 8.2±0.5           | -0.6±0.6                              | 0.365  |
| Leptin (ng/mL)             | 35.5± 2.4                | 37.7± 3.2         | -2.2±3.9                              | 0.585  |
| Adiponectin (µg/mL)        | 10.8±0.4                 | 12.1±0.5          | -1.2±0.7                              | 0.087  |
| HOMA ir                    | 1.8± 0.1                 | 2.0± 0.1          | -0.2±0.1                              | 0.392  |
| Cholesterol (mg/dL)        | 216± 3.4                 | 215± 4.5          | 0.98±5.6                              | 0.862  |
| HDL-c (mg/dL)              | 54± 1.2                  | 56±1.3            | -1.9±1.8                              | 0.289  |
| Triglycerides(mg/dL)       | 105±4.8                  | 93± 5.2           | 12.2±7.4                              | 0.105  |
| LDL-c(mg/dL)               | 141± 3.1                 | 140± 3.8          | 0.5±5.03                              | 0.916  |
| LDL ox (mg/dL)             | 46± 1.1                  | 45± 1.4           | 0.6±1.84                              | 0.730  |
| Alt (IU/L)                 | 22.7± 0.9                | 25.1±2.2          | -2.3±2.1                              | 0.266  |
| Ast (IU/L)                 | 21.7± 0.5                | 22.4± 1.5         | -0.6±1.4                              | 0.641  |
| Uric acid (mg/dL)          | 5.2±0.1                  | 5.1± 0.1          | 0.2±02                                | 0.276  |
| C- Reactive protein (mg/L) | 3.1±0.2                  | 2.7±0.3           | 0.2±04                                | 0.524  |
| TNF-α (pg/mL)              | 0.9± 0.3                 | 0.8± 0.3          | 0.04±0.5                              | 0.328  |

Data are represented as mean ± SEM. BMI: body mass index, HOMA-IR: insulin resistance index. HDL: high-density lipoprotein, LDL: low-density lipoprotein, LDL ox: oxidized low-density lipoprotein, Alt: alanine aminotransferase. Ast: aspartate aminotransferases. TNF-α: tumor necrosis factor alpha. P<0.05 was considered statistically significant. Sex was calculated with Chi2. #1The P value was calculated using Student's t test for dependent samples.

**Supplementary Table S2. Association between methylation sites and SNPs according to “Illumina” of moderately high protein diet (MHP).**

| CpG        | SNP ID                                                                                            | Distance SNP       | MAF                                                                    |
|------------|---------------------------------------------------------------------------------------------------|--------------------|------------------------------------------------------------------------|
| cg16595667 | rs184169976                                                                                       | 33                 | 0.000599                                                               |
| cg11324953 | rs28656215                                                                                        | 46                 | 0.154353                                                               |
| cg26676129 | rs35852004; rs540506053;<br>rs560104704; rs529057818;<br>rs548808509;<br>rs143680522; rs531427124 | 0;3;7;16;20;23;47  | 0.004393;0.000200;0.000200<br>;0.000200;0.000200;0.00079<br>9;0.000200 |
| cg24454263 | rs183951758                                                                                       | 4                  | 0.000998                                                               |
| cg00442529 | rs116217107; rs563385940                                                                          | 14;23              | 0.008986;0.000200                                                      |
| cg10671180 | rs549754257; rs552635880;<br>rs55820639; rs534962514                                              | 36;21;14;2         | 0.000399;0.000200;0.084265<br>;0.000200                                |
| cg05468370 | rs571164011; rs186098253;<br>rs34729; rs34730;<br>rs537827400                                     | 3;14;22;30;37      | 0.000200;0.000200;0.464457<br>;0.406150;0.000200                       |
| cg07710974 | rs186932892                                                                                       | 49                 | 0.001797                                                               |
| cg04906352 | rs183580184                                                                                       | 11                 | 0.0002                                                                 |
| cg10339573 | rs138636499                                                                                       | 27                 | 0.004193                                                               |
| cg19810433 | rs142392033; rs145937875                                                                          | 0;9                | 0.000998;0.000399                                                      |
| cg10634568 | rs578023542                                                                                       | 18                 | 0.001198                                                               |
| cg19723734 | rs573600446; rs147796808;<br>rs3757436; rs576770156                                               | 1;12;47;48         | 0.000200;0.000399;0.031150<br>;0.000399                                |
| cg16313837 | rs535070050; rs553199591;<br>rs574915979; rs541854522                                             | 49;48;6;2          | 0.000599;0.000200;0.000200<br>;0.000200                                |
| cg07322512 | rs71422116; rs575096582;<br>rs540426772                                                           | 30;26;6            | 0.500000;0.000599;0.000200                                             |
| cg02667102 | rs111394148; rs72737179;<br>rs532712448; rs547689734;<br>rs566324190; rs536462558                 | 39;38;25;3;2;1     | 0.003395;0.009385;0.000599<br>;0.000200;0.000599;0.00020<br>0          |
| cg01990482 | rs552485357; rs569116012;<br>rs537850661                                                          | 48;39;19           | 0.000200;0.000200;0.000399                                             |
| cg04448061 | rs566782630; rs534224807                                                                          | 51;36              | 0.000200;0.000200                                                      |
| cg02470045 | rs540571038                                                                                       | 9                  | 0.000399                                                               |
| cg20586947 | rs188702396; rs576445198                                                                          | 47;48              | 0.002196;0.000998                                                      |
| cg03221998 | rs149243986; rs573829261;<br>rs542537744; rs144421266;<br>rs12409509; rs34287859;<br>rs544577633  | 45;39;32;31;16;7;1 | 0.000200;0.000200;0.000200<br>;0.000399;0.007588;0.28594<br>2;0.000200 |
| cg20132612 | rs565444551; rs577439754                                                                          | 35;21              | 0.000200;0.000399                                                      |
| cg05394741 | rs575125850; rs560803611                                                                          | 14;1               | 0.000200;0.000599                                                      |
| cg13318279 | rs117684324                                                                                       | 10                 | 0.047724                                                               |
| cg02540803 | rs570197812; rs535535479;<br>rs549058182                                                          | 34;7;6             | 0.000200;0.000399;0.000399                                             |

MAF: frequency of the minor allele in prediction.

Polymorphisms associated with methylation sites of responder and non-responder groups, recognized by the “Illumina Methylation Array”.

Supplementary Table S3. Association between methylation sites and SNPs according to low-fat (LF) diet “Illumina”.

| CpG        | SNP ID                                                | Distance<br>SNP | MAF                                 |
|------------|-------------------------------------------------------|-----------------|-------------------------------------|
| cg14625906 | rs541571230; rs555295395; rs192222493;<br>rs541283331 | 47;33;30;1      | 0.000200;0.000200;0.000200;0.000200 |
| cg14118991 | rs556501993                                           | 13              | 0.000399                            |
| cg10943232 | rs17103037; rs531137828                               | 15;8            | 0.016573;0.000200                   |
| cg19376658 | rs114803340; rs183557392                              | 35;1            | 0.008986;0.001398                   |
| cg05341260 | rs533199065                                           | 28              | 0.000399                            |
| cg02042086 | rs74903411; rs374838837; rs1554032; rs556210571       | 35;34;34;23     | 0.394569;0.394569;0.197284;0.000200 |
| cg21474679 | rs115798612                                           | 25              | 0.026957                            |
| cg12152566 | rs115817593; rs188713107                              | 28;35           | 0.004393;0.000599                   |
| cg03174507 | rs563640063                                           | 31              | 0.0002                              |
| cg09994109 | rs559168308; rs114748199                              | 31;22           | 0.000200;0.002796                   |
| cg11082237 | rs556828431                                           | 2               | 0.0002                              |

MAF: minor allele frequency in prediction.  
Polymorphisms associated with methylation sites of responder and non-responder groups, recognized by "Illumina Methylation Array".

Supplementary Figures S1. Scatter plots between methylation and change in BMI for each of these MHP diet CpG sites.

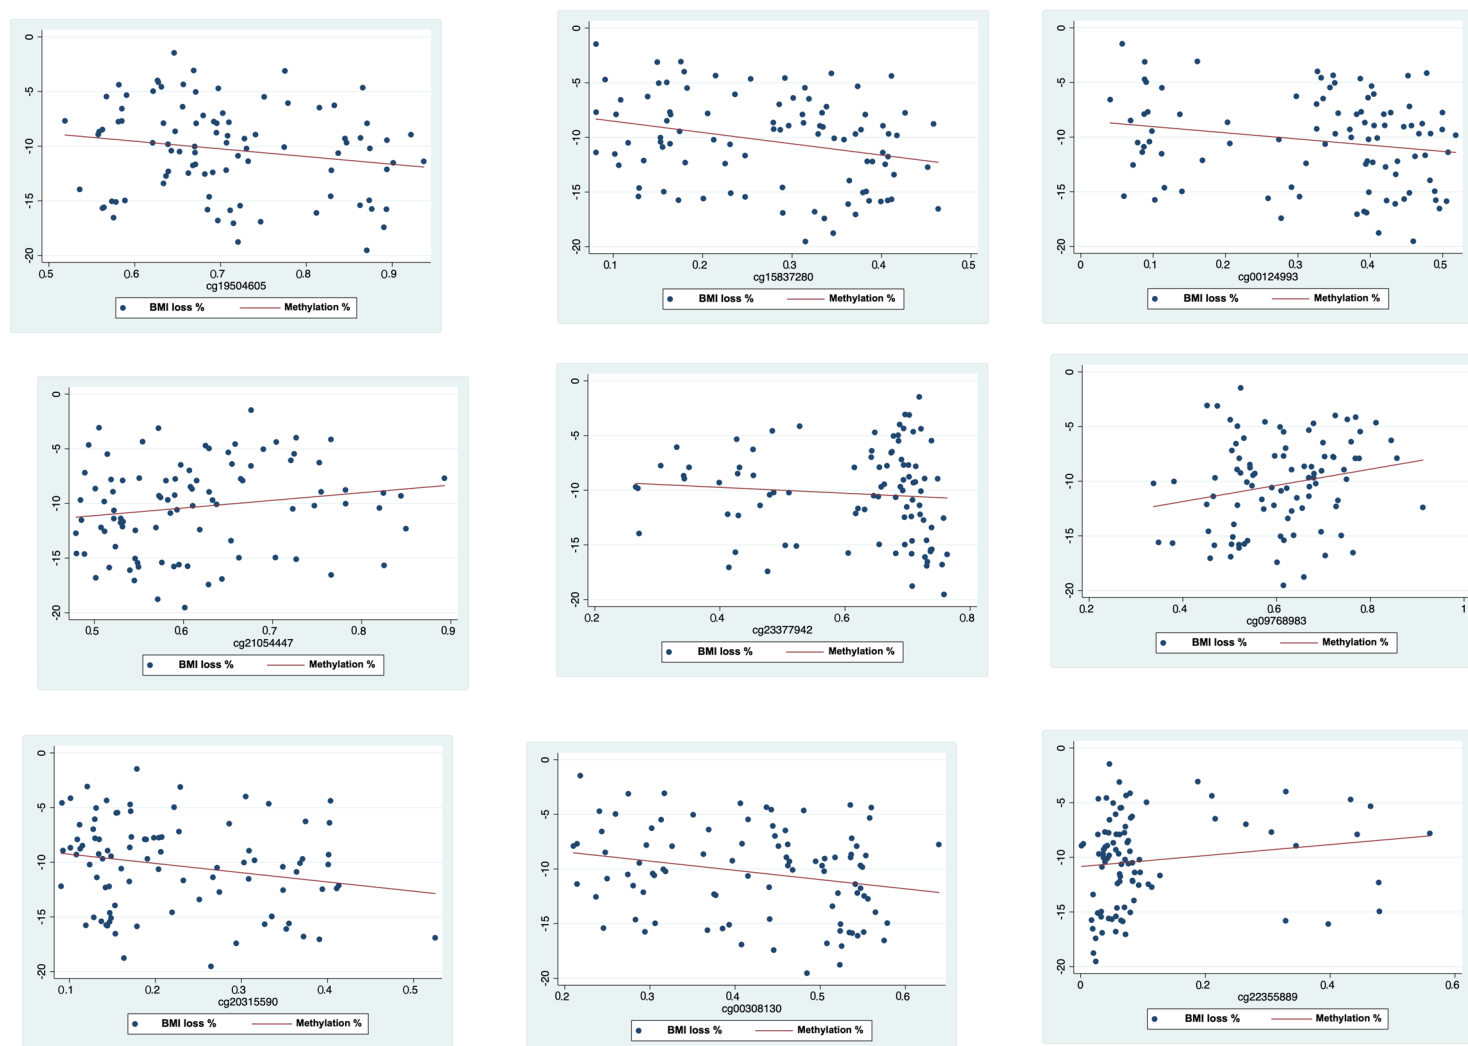

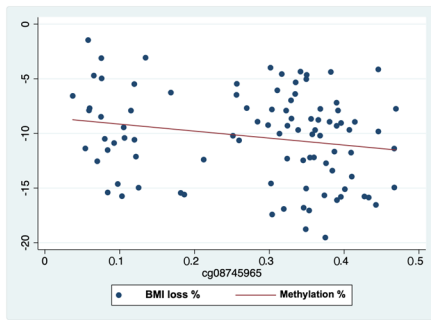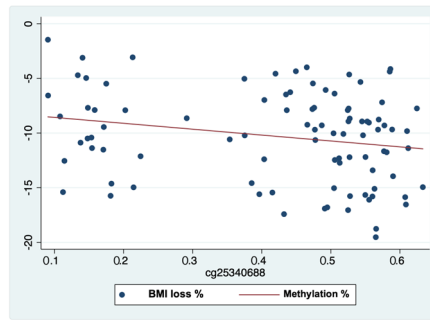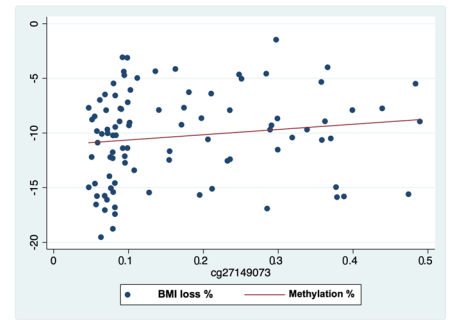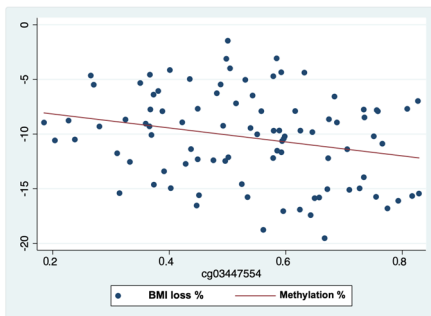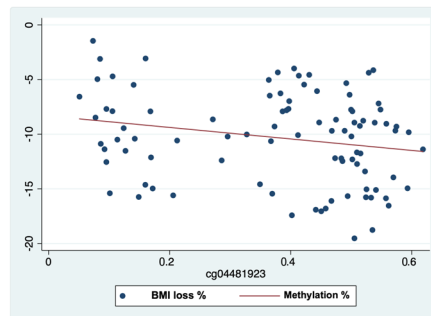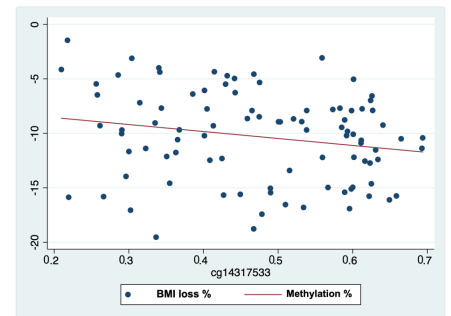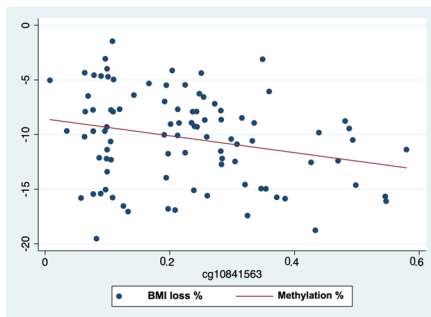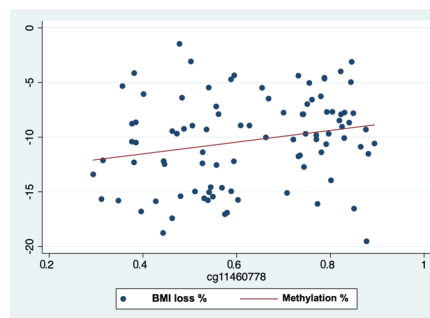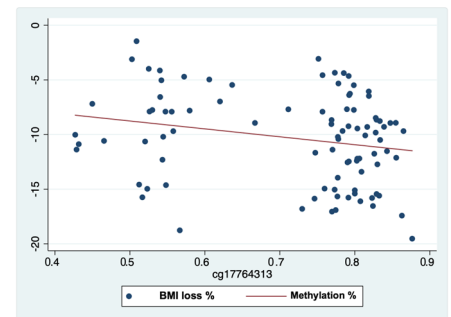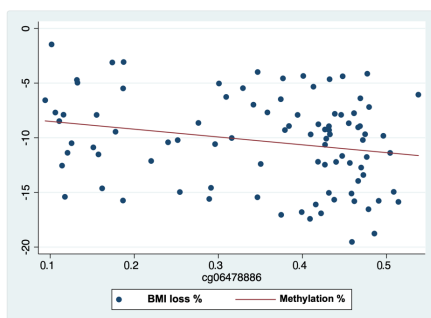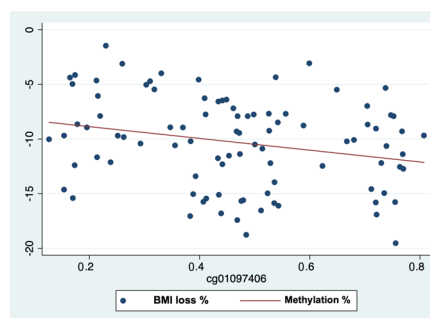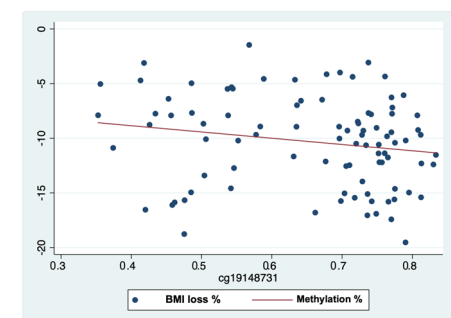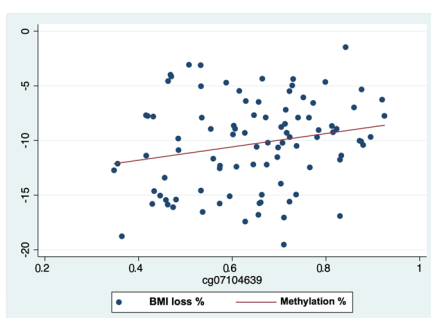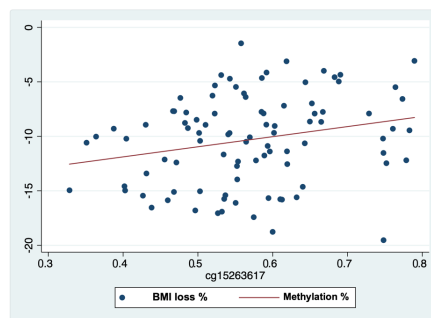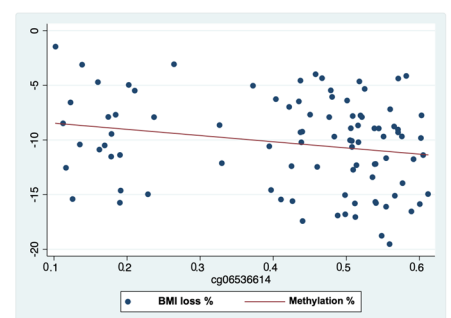

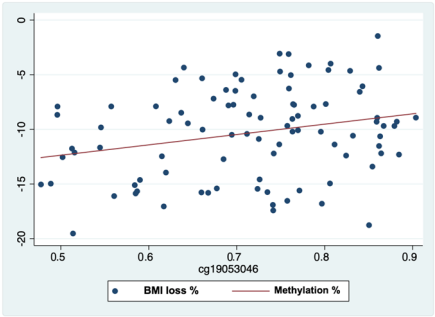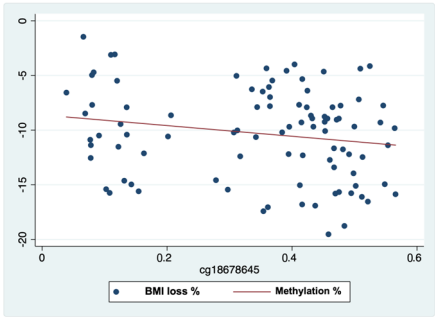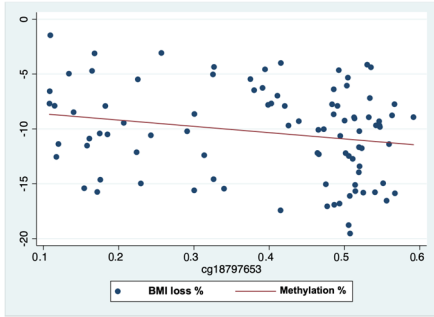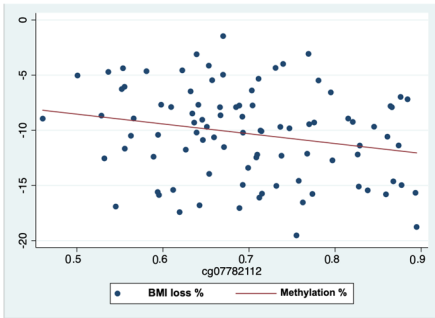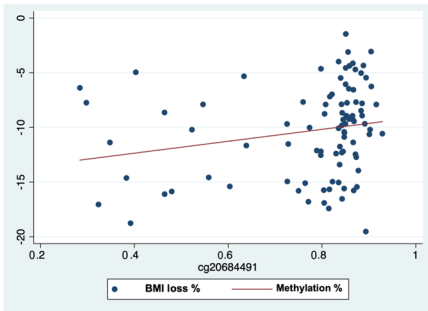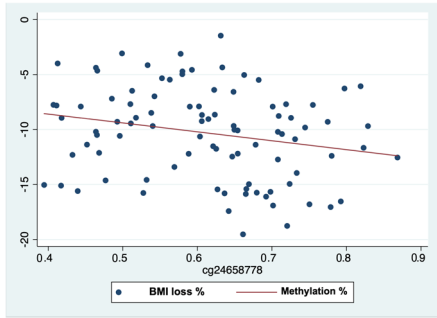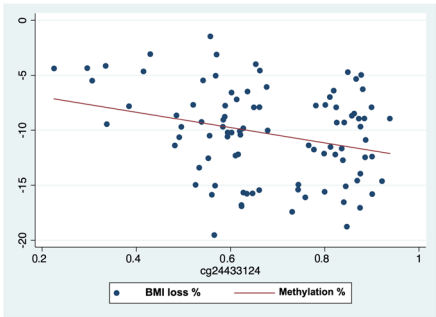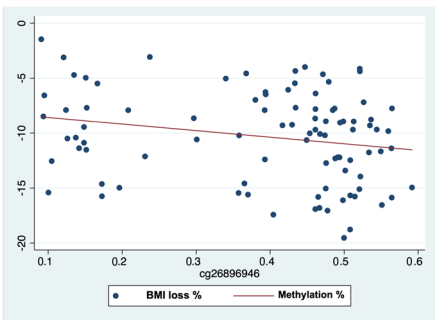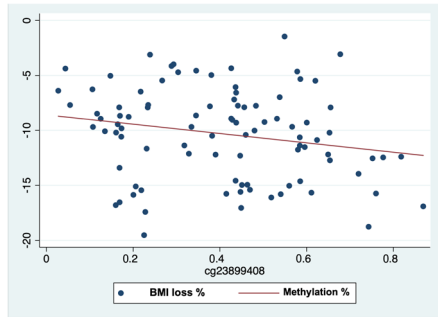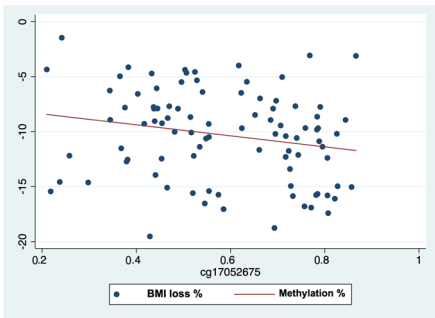

Supplementary Figures S2. Scatter plots between methylation and change in BMI for each of these LF diet CpG sites.

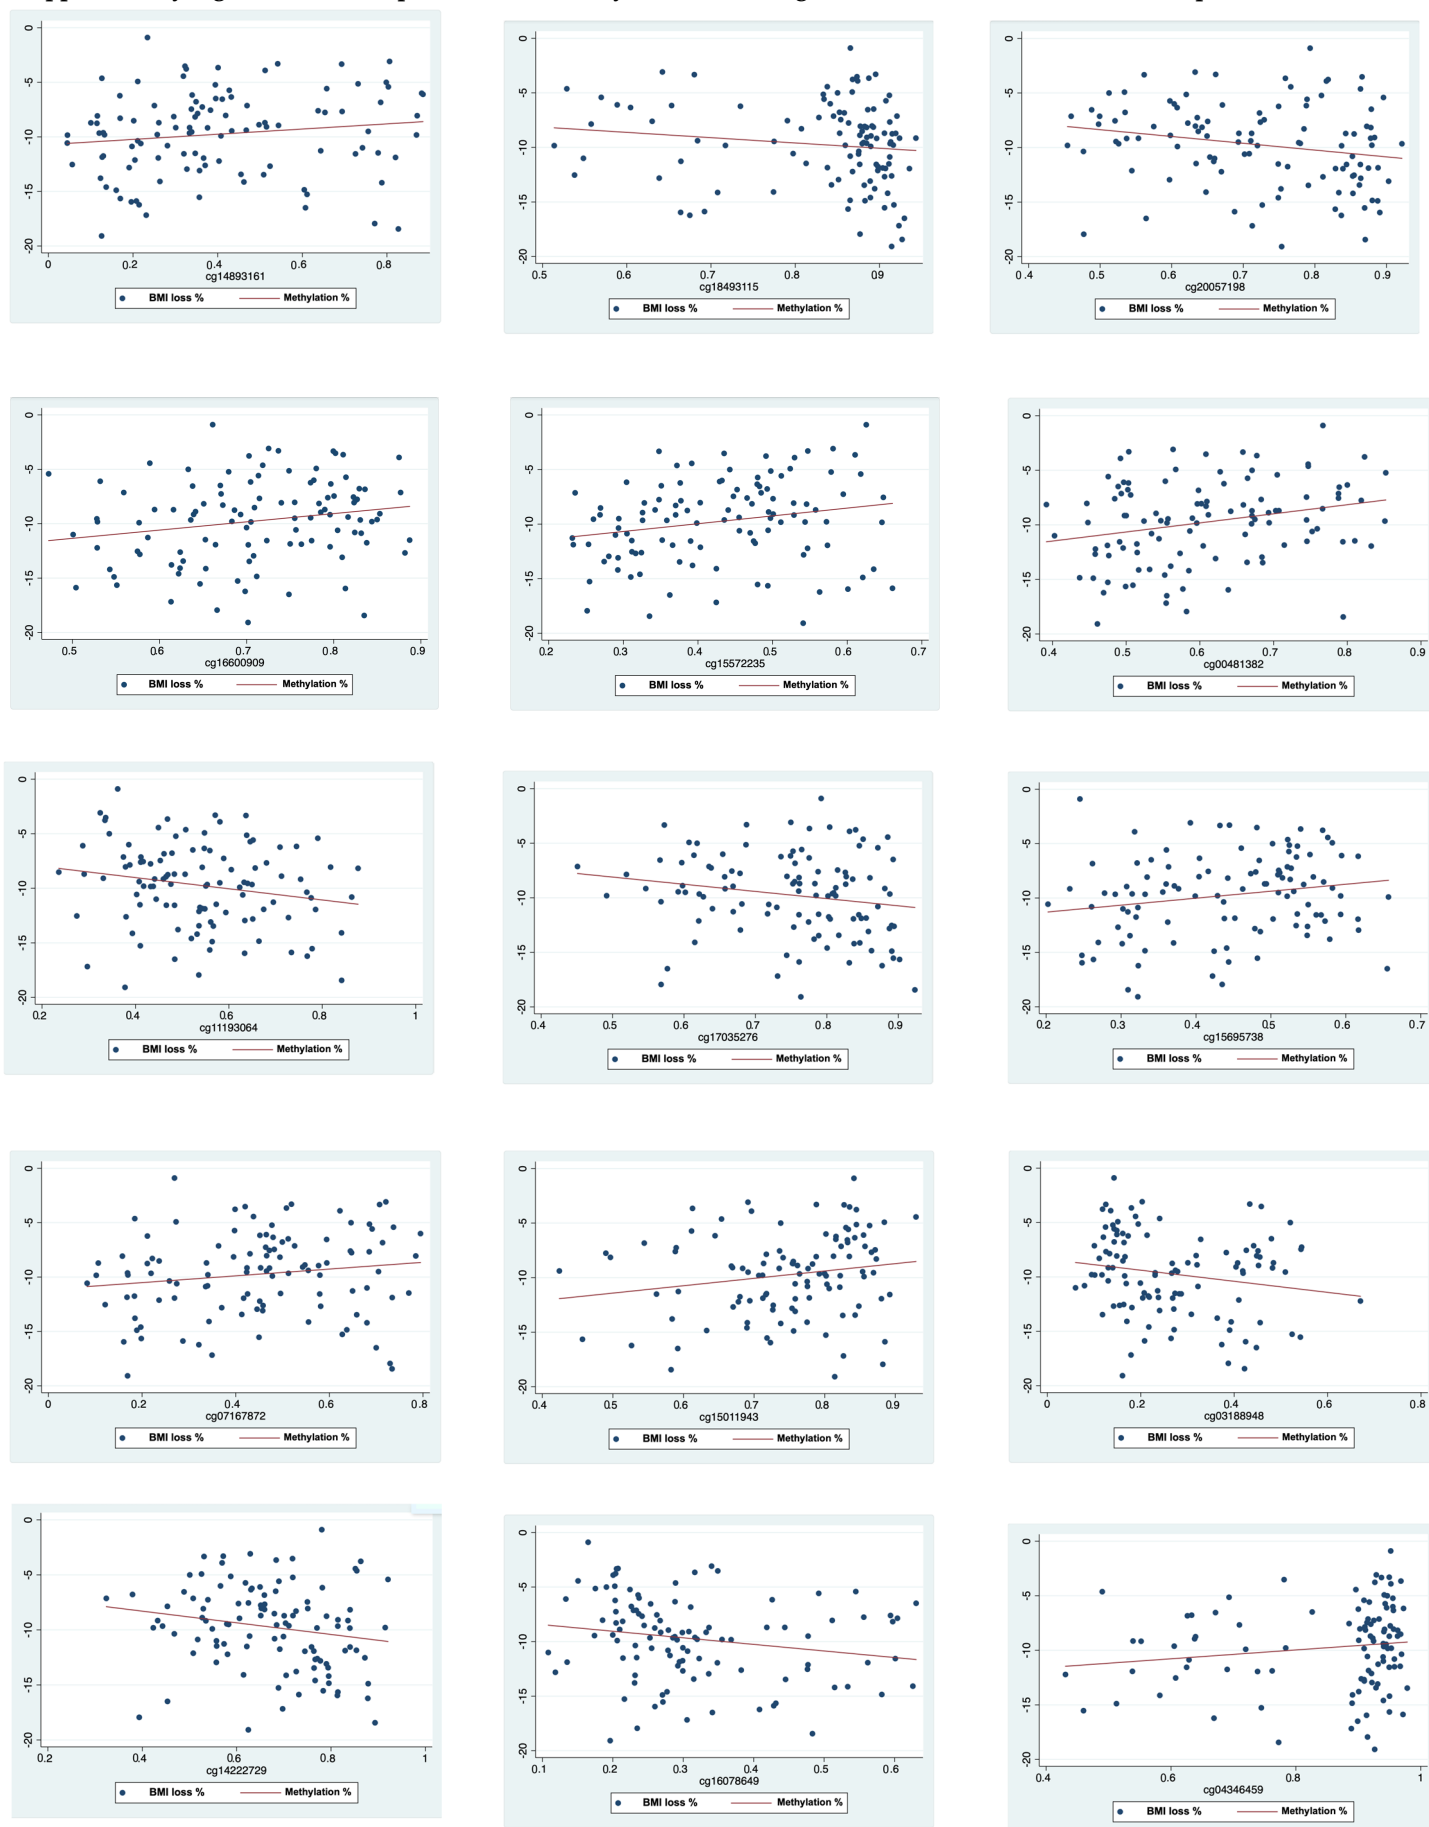

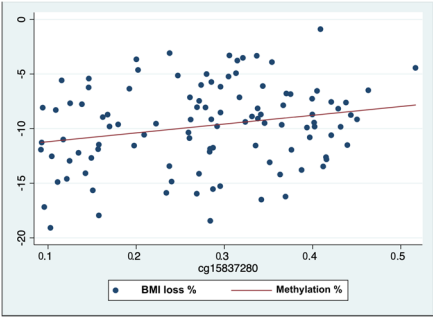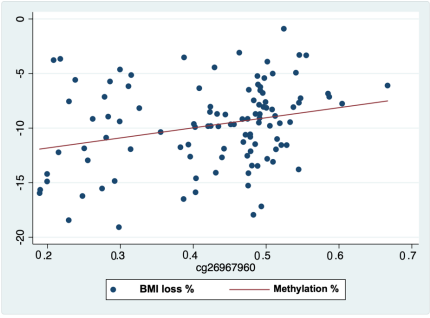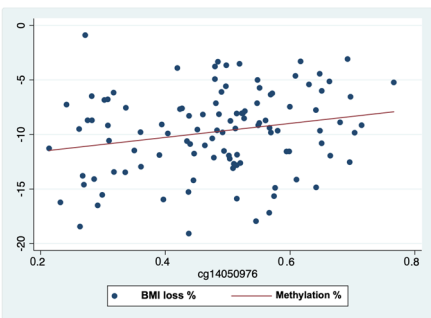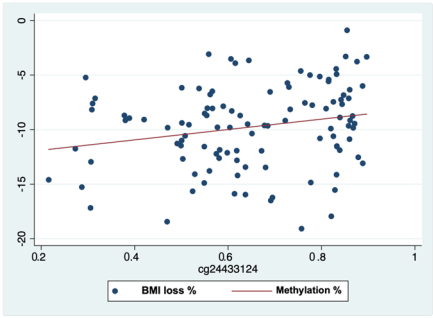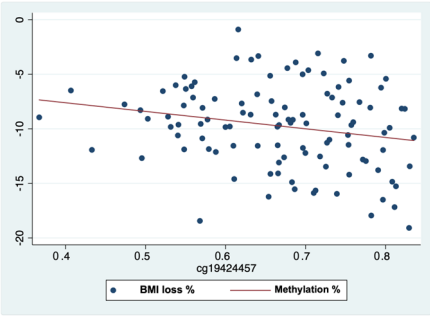

Supplement: s1 [file s1]
